# Social learning strategies regulate the wisdom and madness of interactive crowds

Wataru Toyokawa<sup>1,2,3,†</sup>, Andrew Whalen<sup>4</sup>, and Kevin N. Laland<sup>1</sup>

<sup>1</sup>*School of Biology, University of St Andrews, Harold Mitchel Building, St Andrews, Fife, KY16 9TH, Scotland*

<sup>2</sup>*Japan Society for the Promotion of Science, Kojimachi, Chiyoda-ku, Tokyo, 102-0083, Japan*

<sup>3</sup>*Department of Evolutionary Studies of Biosystems, School of Advanced Sciences, SOKENDAI (The Graduate University for Advanced Studies), Shonan Village, Hayama, Kanagawa 240-0193, Japan*

<sup>4</sup>*The Roslin Institute, University of Edinburgh, Midlothian, SCT, EH25 9RG, Scotland*

<sup>†</sup>*e-mail address: wt25@st-andrews.ac.uk*

1

## Abstract

2

3

4

5

6

7

8

9

10

11

12

13

14

Why groups of individuals sometimes exhibit collective ‘wisdom’ and other times maladaptive ‘herding’ is an enduring conundrum. Here we show that this conflict is regulated by the social learning strategies deployed. We examined the patterns of human social learning through an interactive online experiment with 699 participants, varying both task uncertainty and group size, then used hierarchical Bayesian model-fitting to identify the individual learning strategies exhibited by participants. Challenging tasks elicit greater conformity amongst individuals, with rates of copying increasing with group size, leading to high probabilities of maladaptive herding amongst large groups confronted with uncertainty. Conversely, the reduced social learning of small groups, and the greater probability that social information would be accurate for less-challenging tasks, generated ‘wisdom of the crowd’ effects in other circumstances. Our model-based approach provides novel evidence that the likelihood of swarm intelligence versus herding can be predicted, resolving a longstanding puzzle in the literature.

15

*Keywords:*

16

17

swarm intelligence, herding, social learning, computational modelling, web-based experiment, hierarchical Bayesian approach

18 Understanding the mechanisms that account for accurate collective decision-making amongst  
19 groups of animals has been a central focus of animal behaviour research (Bonabeau et al., 1999;  
20 Camazine et al., 2001; Sumpter, 2010). There are a large number of biological examples showing  
21 that collectives of poorly informed individuals can achieve a high performance in solving cog-  
22 nitive problems under uncertainty (Krause et al., 2010). Examples of such ‘swarm intelligence’  
23 – the emergent wisdom of interactive crowds – have been found in a broad range of biological  
24 systems (Table 1). Although these findings suggest fundamental cognitive benefits of grouping  
25 (Krause and Ruxton, 2002), there is also a long-standing recognition, especially for humans, that  
26 interacting individuals may sometimes be overwhelmed by the ‘*extraordinary popular delusions*  
27 *and madness of crowds*’ (Mackay, 1841). Herd behaviour (i.e. an alignment of thoughts or be-  
28 haviours of individuals in a group) occurs because individuals imitate each others (Kameda and  
29 Hastie, 2015; Le Bon, 1896; Raafat et al., 2009), and it is thought to be a cause of financial  
30 bubbles (Chari and Kehoe, 2004; Mackay, 1841), ‘groupthink’ (Janis, 1972) and volatility in  
31 cultural markets (Muchnik et al., 2013; Salganik et al., 2006). More generally, herding is known  
32 to undermine the wisdom of crowds effect (Lorenz et al., 2011), whilst maladaptive aspects of  
33 information transfer are well-recognised in the biological literature (e.g. Giraldeau et al., 2002).  
34 It seems that information transmission among individuals, and making decisions collectively, is  
35 a double-edged sword: combining decisions may provide the benefits of swarm intelligence, but  
36 at the same time, increase the risk of maladaptive herding. Collectively, an understanding of  
37 whether and, if so, how it is possible to prevent or reduce the risk of maladaptive herd behaviour,  
38 while concurrently keeping or enhancing swarm intelligence, is largely lacking.

39 A balance between using individual and social information may play a key role in determining

**Table 1**

Examples of swarm intelligence in diverse biological systems

---

| Taxonomic families | Examples and references                                                                                                                                                               |
|--------------------|---------------------------------------------------------------------------------------------------------------------------------------------------------------------------------------|
| Slime moulds       | Finding conditions favorable to spore survival and dispersal (Reid and Latty, 2016)                                                                                                   |
| Social insects     | Collective foraging (Seeley et al., 1991; Shaffer et al., 2013) and nest-site selection (Franks et al., 2003; Sasaki and Pratt, 2012; Sasaki et al., 2013; Seeley and Visscher, 2004) |
| Fish               | Collective sensing (Berdahl et al., 2013; Sumpter et al., 2008), predator avoidance (Ward et al., 2011) and foraging decisions (Webster et al., 2017)                                 |
| Birds              | Collective foraging (Liker and Bokony, 2009; Morand-Ferron and Quinn, 2011) and homing decisions (Sasaki and Biro, 2017)                                                              |
| Non-human primates | Group coordination in where and when to move (King and Sueur, 2011)                                                                                                                   |
| Humans             | Decision-making in an estimation task (Krause et al., 2011; Rosenberg and Pescetelli, 2017) and in a multi-armed bandit task (Toyokawa et al., 2014)                                  |

---

40 the trade-off between collective wisdom and maladaptive herding (List et al., 2009). If individu-  
41 als are too reliant on copying others' behaviour, any ideas, even a maladaptive one, can propagate  
42 in the social group (i.e. the 'informational cascade'; Bikhchandani et al., 1992; Giraldeau et al.,  
43 2002; Richerson and Boyd, 2005). On the other hand, however, if individuals completely ignore  
44 social information so as to be independent, they will fail to exploit the benefits of aggregating  
45 information through social interactions. The extent to which individuals should use social in-  
46 formation should fall between these two extremes. Theoretical models predict that the balance  
47 between independence and interdependence in collective decision-making may be changeable,  
48 contingent upon the individual-level flexibility and inter-individual variability associated with  
49 the social learning strategies deployed in diverse environmental states (e.g. Arbilly et al., 2011;  
50 Boyd and Richerson, 1985; Feldman et al., 1996; Laland, 2004).

51 Animals (including humans) are reported to increase their use of social information as re-  
52 turns from asocial learning become more unreliable (e.g. Kameda and Nakanishi, 2002; Kendal  
53 et al., 2004; Morgan et al., 2012; Toyokawa et al., 2017; Webster and Laland, 2008, 2011). In  
54 addition, individuals are predicted to be more likely to rely on social learning larger the number  
55 of individuals that share information (Boyd and Richerson, 1989; Bond, 2005; Kline and Boyd,  
56 2010; Morgan et al., 2012; Muthukrishna et al., 2014; Street et al., 2017). This selectivity in the  
57 predicted use of social information may have a substantial impact on collective decision-making  
58 because only a slight difference in the parameter values of social information use is known to  
59 be able to alter qualitatively the collective behavioural dynamics (e.g. Bonabeau et al., 1999;  
60 Camazine et al., 2001; Nicolis and Deneubourg, 1999; Pratt and Sumpter, 2006). Therefore, re-  
61 searchers should expect populations to exhibit a higher risk of being trapped with maladaptive

62 behaviour with increasing group size and decreasing reliability of asocial learning (and concomi-  
63 tant increased reliance on social learning).

64 From the viewpoint of the classic wisdom of crowds theory, increasing group size may in-  
65 crease collective accuracy (List, 2004; King and Cowlshaw, 2007; Wolf et al., 2013; Becker  
66 et al., 2017; Laan et al., 2017). The relative advantage of the collective over solitary individuals  
67 may also be highlighted by increased task difficulty, because there would be more room in the  
68 performance to be improved compared to easier tasks in which high accuracy can already be  
69 achieved by asocial learning only (Cronin, 2016). To understand the potential conflict between  
70 swarm intelligence and the risk of maladaptive herding requires fine-grained quantitative studies  
71 of social learning strategies and their relations to collective dynamics, linked to sophisticated  
72 computational analysis.

73 The aims of this study were twofold. First, we set to test the hypothesis that the circum-  
74 stances under which collective decision making will generate ‘wisdom’ can be predicted with  
75 knowledge of the precise learning strategies individuals deploy, through a combination of exper-  
76 imentation and theoretical modelling. The choice of an abstract decision-making task allowed  
77 us to implement a computational modelling approach, which has been increasingly deployed in  
78 quantitative studies of animal social learning strategies (Ahn et al., 2014; Aplin et al., 2017; Bar-  
79 rett et al., 2017; McElreath et al., 2005, 2008; Toyokawa et al., 2017). In particular, computational  
80 modelling allowed us to conduct a parametric description of different information-gathering pro-  
81 cesses and to estimate these parameter values at an individual-level resolution. This approach  
82 allows us to characterize the complex relationship between individual-level decision, learning  
83 strategies and collective-level behavioural dynamics. Second, we added resolution to our analy-

84 ses by manipulating both task uncertainty and group size in our experiments with adult human  
85 subjects, predicting that these factors would induce heavier use of social information in humans,  
86 and thereby alter the balance between swarm intelligence and the risk of maladaptive herding.  
87 To do this, we focused on human groups exposed to a simple gambling task, where both aso-  
88 cial and social sources of information were available. Through development of an interactive,  
89 web-based collective decision-making task (i.e. multi-player multi-armed bandit), and use of  
90 hierarchical Bayesian statistical methods in fitting our computational model to the experimen-  
91 tal data, we identify the individual-level learning strategies of participants as well as quantify  
92 variation in different learning parameters, allowing us to conduct an informed exploration of the  
93 population-level outcomes. The results provide clear evidence that the conflict between swarm  
94 intelligence and maladaptive herding can be predicted with knowledge of human social learning  
95 strategies.

96 Below, we firstly described our experimental task and summarise the computational model.  
97 Then, we deploy agent-based simulation to illustrate how the model parameters relating to social  
98 learning can in principle affect the collective-level behavioural dynamics. The simulation pro-  
99 vides us with precise, quantitative predictions on the complex relationship between individual  
100 behaviour and group dynamics. Finally, we present the findings of a multi-player web-based ex-  
101 periment with human participants that utilises the gambling task framework. Applying a hierar-  
102 chical Bayesian statistical method, we estimated the model's parameters for each of 699 different  
103 individuals, allowing us to (i) examine whether and, if so, how social information use is affected  
104 by different group size and task uncertainty, and (ii) whether and how social-information use  
105 affects the balance between swarm intelligence and maladaptive herding.

106       **Task overview:** To study the relationship between social information use and collective  
107 behavioural dynamics, we focused on a well-established learning-and-decision problem called  
108 a ‘multi-armed bandit’ task, represented here as repeated choices between three slot machines  
109 (Figure S1, Video 1, for detail see Materials and methods). Individuals play the task for 70  
110 rounds. The slots paid off money noisily, varying around two different means during the first 40  
111 rounds such that there was one ‘good’ slot and two other options giving poorer average returns.  
112 From the round 41st, however, one of the ‘poor’ slots abruptly increased its mean payoff to  
113 become ‘excellent’ (i.e. superior to ‘good’). The purpose of this environmental change was  
114 to observe the effects of maladaptive herding by potentially trapping groups in the out-of-date  
115 suboptimal (good) slot, as individuals did not know whether or how an environmental change  
116 would occur. Through making choices and earning a reward from each choice, individuals could  
117 gradually learn which slot generated the highest rewards.

118       In addition to this asocial learning, we provided social information for each member of the  
119 group specifying the frequency with which group members chose each slot. All group mem-  
120 bers played the same task with the same conditions simultaneously, and all individuals had been  
121 instructed that this was the case, and hence understood that the social information would be in-  
122 formative.

123       Task uncertainty was experimentally manipulated by changing the difference between the  
124 mean payoffs for the slot machines. In the task with the least uncertainty, the distribution of  
125 payoffs barely overlapped, whilst in the task with the greatest uncertainty the distribution of  
126 payoffs overlapped considerably (Figure S3).

127       **Overview of the computational learning-and-decision-making model:** We modelled in-



128 individual behavioural processes by assuming that individual  $i$  makes a choice for option  $m$  at  
129 round  $t$ , in accordance with the choice-probability  $P_{i,t}(m)$  that is a weighted average of social and  
130 asocial influences:

$$P_{i,t}(m) = \sigma_{i,t} \times \text{Social influence}_{i,m,t} + (1 - \sigma_{i,t}) \times \text{Asocial influence}_{i,m,t}, \quad (1)$$

131 where  $\sigma_{i,t}$  is the *social learning weight* ( $0 \leq \sigma_{i,t} \leq 1$ ).

132 For the social influence, we assumed a frequency-dependent copying strategy by which an  
133 individual copies others' behaviour in accordance with the distribution of social frequency infor-  
134 mation (McElreath et al., 2005, 2008; Aplin et al., 2017; Barrett et al., 2017):

$$\text{Social influence}_{i,m,t} = \frac{\left(\text{frequency}_{m,t-1}\right)^{\theta_i}}{\sum_{k \in \text{options}} \left(\text{frequency}_{k,t-1}\right)^{\theta_i}}, \quad (2)$$

135 where  $\text{frequency}_{m,t-1}$  is a number of choices made by other individuals for the option  $m$  in the  
136 preceding round  $t - 1$  ( $t \geq 2$ ). The exponent  $\theta_i$  is individual  $i$ 's *conformity exponent* ( $-\infty \leq$   
137  $\theta_i \leq +\infty$ ). When this exponent is larger than zero ( $\theta_i > 0$ ), higher social influence is afforded to  
138 an option chosen by more individuals (i.e. positive frequency bias), with conformity bias arising  
139 when  $\theta_i > 1$ , such that disproportionately more social influence is given to the most common  
140 option (Boyd and Richerson, 1985). When  $\theta_i < 0$ , on the other hand, higher social influence is  
141 afforded to the option that fewest individuals chose in the preceding round  $t - 1$  (i.e. negative  
142 frequency bias). Note, there is no social influence when  $\theta_i = 0$  because in this case the 'social  
143 influence' favours an uniformly random choice, i.e.,  $\text{Social influence}_{i,m,t} = f_m^0 / (f_1^0 + f_2^0 + f_3^0) =$   
144  $1/3$ , independent of the social frequency distribution.

145 For the asocial influence, we used a standard ‘softmax’ choice rule well-established in the  
146 reinforcement-learning literature (Sutton and Barto, 1998) and widely applied in human social  
147 learning studies (e.g. McElreath et al., 2005, 2008; Toyokawa et al., 2017).

148 In summary, the model has two key social learning parameters, the *social learning weight*  $\sigma_{i,t}$   
149 and the *conformity exponent*  $\theta_i$ , with  $\sigma_{i,t}$  a time-dependent variable (i.e. individuals could modify  
150 their reliance on social learning as the task proceeded). Varying these parameters systematically,  
151 we conducted an individual-based simulation so as to establish quantitative predictions concern-  
152 ing the relationship between social information use and collective behaviour. We then fitted this  
153 model to our experimental data using a hierarchical Bayesian approach. This method allows  
154 us to specify with precision how each individual subject learns (i.e. which learning strategy or  
155 strategies they deploy), and thereby to describe the range and distribution of learning strategies  
156 deployed across the sample, and to investigate their population-level consequences.

## 157 **1 Results**

### 158 **1.1 The relationship between social information use and the collective behaviour**

159 Figure 1 shows the relationship between the average decision accuracy and individual-level social  
160 information use obtained from our individual-based model simulations. Figure 1a and 1c show  
161 that individuals in larger groups perform better both before and after the environmental change  
162 when the mean conformity exponent  $\bar{\theta}$  is small (i.e.  $\bar{\theta} = (\sum_i \theta_i)/individuals = 1$ ). In the  
163 absence of conformity, even when the average social learning weight is very high (i.e.  $\bar{\sigma} =$   
164  $(\sum_i \sum_t \sigma_{i,t})/(individuals \times rounds) = 0.9$ ), larger groups are still able to recover the decision

165 accuracy after the location of the optimal option has been switched.

166 On the other hand, when the mean conformity exponent is large (i.e.  $\bar{\theta} = 3$ ; strong confor-  
167 mity bias), the group dynamics become less flexible, and become vulnerable to getting stuck on  
168 a suboptimal option after environmental change. Here, the recovery of performance after envi-  
169 ronmental change takes more time in larger compared to smaller groups (Figure 1b). When both  
170 the conformity exponent  $\bar{\theta}$  and the social learning weight  $\bar{\sigma}$  are large (Figure 1d), performance  
171 is no longer monotonically improving with increasing group size, and it is under these circum-  
172 stances that the strong herding effect becomes prominent. Figure 2c and 2d indicate that when  
173 both  $\bar{\theta}$  and  $\bar{\sigma}$  are large the collective choices converged either on the good option or on one of the  
174 poor options almost randomly, regardless of the option's quality, and that once individuals start  
175 converging on an option the population gets stuck. As a result, the distribution of the groups'  
176 average performance over the replications becomes a bimodal 'U-shape'. Interestingly, however,  
177 the maladaptive herding effect remains relatively weak in smaller groups (see Figure 2c; the black  
178 histograms). This is because the majority of individuals in smaller groups (i.e. two individuals  
179 out of three) are more likely to break the cultural inertia by simultaneously exploring for another  
180 option than the majority in larger groups (e.g. six out of ten). As expected, herding does not  
181 occur in the absence of conformity (Figure 2a, 2b).

182 In summary, the model simulation suggests an interaction between social learning weight  $\bar{\sigma}$   
183 and conformity exponent  $\bar{\theta}$  on decision accuracy and the risk of maladaptive herding: When the  
184 conformity exponent is not too large, swarm intelligence is prominent across a broad range of  
185 the mean social learning weights (i.e. increasing group size can increase decision accuracy while  
186 concurrently retaining decision flexibility). When the conformity bias becomes large, however,

187 the risk of maladaptive herding arises, and, when both social learning parameters are large, swarm

188 intelligence is rare and maladaptive herding dominates.

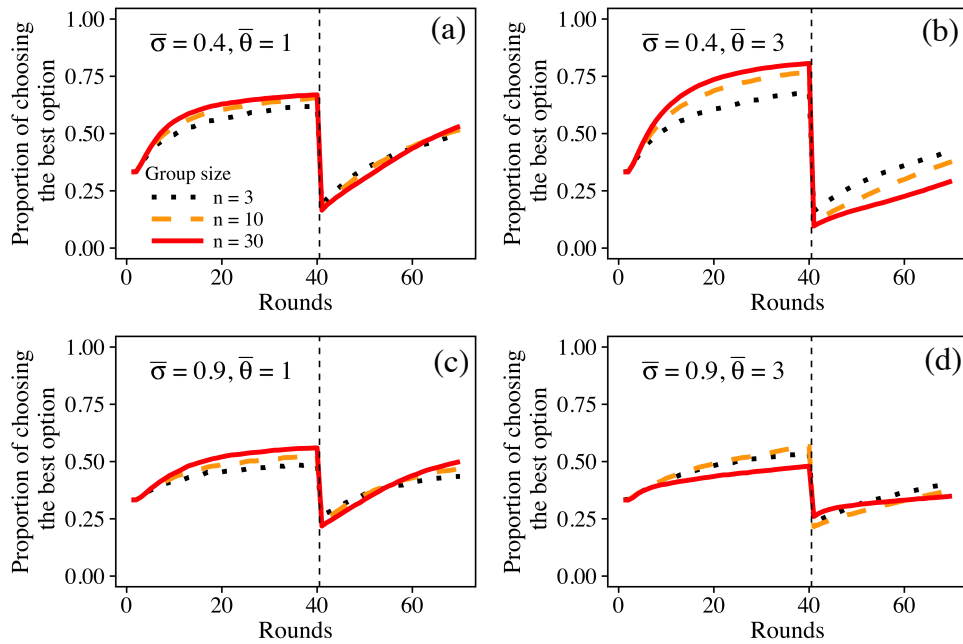

**Figure 1:** Findings of the individual-based model showing the effects of social information use on the average decision accuracy over replications. The x-axis gives the round and y-axis gives the proportion of individuals expected to choose the optimal slot (i.e. decision accuracy) averaged over all replications. The vertical dashed line indicates the timing of environmental (i.e. payoff) change (at  $t = 41$ ). Different group sizes are shown by different styles (black (dotted):  $n = 3$ , orange (dashed):  $n = 10$ , red (solid):  $n = 30$ ). We set the average slopes for the *social learning weight* to be equal to zero for the sake of simplicity; namely,  $\mu_\delta = 0$ . Other free parameter values (i.e.  $\mu_\alpha$ ,  $\mu_{\beta_0^*}$ ,  $\mu_\epsilon$ ,  $v_\alpha$ ,  $v_{\beta_0^*}$ ,  $v_\epsilon$ ,  $v_\sigma$ ,  $v_\delta$  and  $v_\theta$ ) are best approximates to the experimental fitted values (see Table 2 and Table S1).

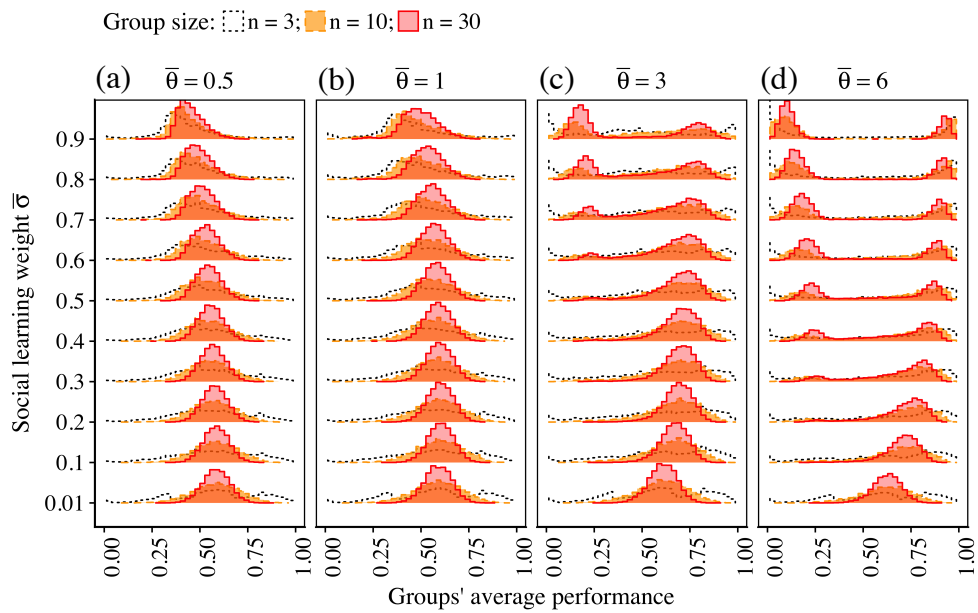

**Figure 2:** Results from the individual-based model simulations showing the distribution of each group's mean accuracy before environmental change. The x-axis gives the mean decision accuracy over the first 40 rounds (i.e. the environment 1) for each replication. Different group sizes are shown by different styles (black (dotted):  $n = 3$ , orange (dashed):  $n = 10$ , red (solid):  $n = 30$ ). Again,  $\mu_\delta = 0$ , and other free parameter values (i.e.  $\mu_\alpha$ ,  $\mu_{\beta_0^*}$ ,  $\mu_\epsilon$ ,  $\nu_\alpha$ ,  $\nu_{\beta_0^*}$ ,  $\nu_\epsilon$ ,  $\nu_\sigma$ ,  $\nu_\delta$  and  $\nu_\theta$ ), we approximated using experimental data (see Table 2 and Table S1).

## 189 **1.2 Estimation of human social information use**

190 Table 2 reveals how the *social learning weight*  $\sigma_{i,t}$  and *conformity exponent*  $\theta_i$  were influenced  
191 by task uncertainty in our behavioral experiment. It gives posterior estimation values for each of  
192 the global means of the learning model parameters, obtained by the hierarchical Bayesian model  
193 fitting method applied to the experimental data (see the Materials and methods). The fitted global  
194 variance parameters (i.e.  $v$ ) are shown in the Supporting Table S1.

**Table 2**

The mean and the 95% Bayesian credible intervals of the posterior global means for the parameter values. The number of participants ( $N$ ) for each experimental condition are also shown.

| Parameters                         | Group condition         |                         |                         |                       |                        |                       | Solitary condition |          |      |  |
|------------------------------------|-------------------------|-------------------------|-------------------------|-----------------------|------------------------|-----------------------|--------------------|----------|------|--|
|                                    | Uncertainty             |                         |                         | Uncertainty           |                        |                       | Uncertainty        |          |      |  |
|                                    | Low                     | Moderate                | High                    | Low                   | Moderate               | High                  | Low                | Moderate | High |  |
| $\mu_{\alpha^*}$ (learning rate)   | 0.99<br>[0.34, 1.73]    | 0.90<br>[0.43, 1.44]    | 0.61<br>[0.21, 1.03]    | 0.85<br>[-0.07, 1.95] | -0.17<br>[-1.27, 0.89] | 0.46<br>[-0.39, 1.36] |                    |          |      |  |
| $\mu_{\beta_0^*}$ (inv. temp.)     | 1.84<br>[1.15, 2.70]    | 1.68<br>[1.25, 2.18]    | 1.38<br>[1.16, 1.62]    | 1.10<br>[0.69, 1.54]  | 1.44<br>[0.80, 2.07]   | 0.85<br>[0.46, 1.22]  |                    |          |      |  |
| $\mu_{\epsilon}$ (inv. temp.)      | 3.70<br>[1.98, 5.71]    | 3.01<br>[1.88, 4.27]    | 2.97<br>[2.37, 3.60]    | 2.39<br>[1.46, 3.53]  | 2.81<br>[1.64, 4.07]   | 2.27<br>[1.40, 3.31]  |                    |          |      |  |
| $\mu_{\sigma_0^*}$ (soc. wight)    | -1.55<br>[-2.71, -0.71] | -2.37<br>[-4.12, -1.01] | -2.16<br>[-2.81, -1.63] | -                     | -                      | -                     |                    |          |      |  |
| $\mu_{\delta}$ (soc. wight)        | -1.39<br>[-2.66, -0.03] | -1.55<br>[-4.29, 0.91]  | -1.87<br>[-3.04, -0.81] | -                     | -                      | -                     |                    |          |      |  |
| $\mu_{\theta}$ (conformity coeff.) | 1.65<br>[0.83, 2.82]    | 3.00<br>[1.57, 4.85]    | 2.67<br>[1.80, 3.73]    | -                     | -                      | -                     |                    |          |      |  |
| $N$                                | 77                      | 98                      | 398                     | 36                    | 34                     | 56                    |                    |          |      |  |

195 We were able to categorize the participants as deploying three different learning strategies  
196 based on their fitted conformity exponent values; namely, the ‘positive frequency-dependent  
197 copying’ strategy ( $\theta_i \gg 0$ ), the ‘negative-frequency dependent copying’ strategy ( $\theta_i \ll 0$ ) and  
198 the ‘random choice’ strategy ( $\theta_i \approx 0$ ). Note that we could not reliably detect the ‘weak positive’  
199 frequency-dependent strategy ( $0 < \theta_i \leq 1$ ) due to the limitation of statistical power (Figure S10  
200 and S17). Some individuals whose ‘true’ conformity exponent fell between zero and one would  
201 have been categorised as exhibiting a random choice strategy (Figure S10). Individuals identi-  
202 fied as exhibiting a positive frequency-dependent copiers were mainly those whose conformity  
203 exponent was larger than one ( $\theta_i > 1$ ).

204 Figure 3a-c show the estimated frequencies of different learning strategies. Generally speak-  
205 ing, participants were more likely to utilize a positive frequency-dependent copying strategy  
206 than the other two strategies (the 95% Bayesian CI of the intercept of the GLMM predicting the  
207 probability to use the positive frequency-dependent copying strategy is above zero, [1.05, 2.50];  
208 Table S2). We found that positive frequency-dependent copying decreased with increasing task  
209 uncertainty (the 95% Bayesian CI of task uncertainty effect is below zero, [-1.88, -0.25]; Table  
210 S2). We found no clear effects of either the group size, age or gender on adoption of the positive  
211 frequency-dependent copying strategy, except for the negative interaction effect between age and  
212 task uncertainty (the 95% Bayesian CI of the age  $\times$  uncertainty interaction = [-1.46, -0.15]; Table  
213 S2).

214 We also investigated the effects of group size and task uncertainty on the fitted individual  
215 parameter values. We found that the individual mean *social learning weight* parameter (i.e.  
216  $\bar{\sigma}_i = (\sum_t \sigma_{i,t})/70$ ) increased with group size (the 95% Bayesian CI = [0.15, 0.93]; Figure 3d-f;



217 Table S3), and decreased with uncertainty (the 95% Bayesian CI = [-0.98, -0.22]), and age of  
218 subject (the 95% Bayesian CI = [-0.36, -0.02]). However, the negative effects of task uncertainty  
219 and age disappeared when we focused only on  $\bar{\sigma}_i$  of the positive frequency-dependent copying  
220 individuals, and only the positive effect of the group size was confirmed (Table S4; Figure S16).  
221 It is worth noting that the meaning of the social learning weight is different between these three  
222 different strategies: The social learning weight regulates positive reactions to the majorities' be-  
223 haviour for positive frequency-dependent copiers, whereas it regulates avoidance of the majority  
224 for negative-frequency dependent copiers, and determines the probability of random decision-  
225 making for the random choice strategists.

226 The individual *conformity exponent* parameter  $\theta_i$  increased with task uncertainty (the 95%  
227 Bayesian CI = [0.38, 1.41]), but we found no significant effects of group size, age, gender or  
228 interactions (Figure 3g-i; Table S5). These results were qualitatively unchanged when we focused  
229 only on the positive frequency-dependent copying individuals (Table S6; Figure S16).

230 We observed extensive individual variation in social information use. The greater the task's  
231 uncertainty, the larger were individual variances in both the mean social learning weight and the  
232 conformity exponent (the 95% Bayesian CI of the GLMM's variation parameter for  $\bar{\sigma}_i$  was [1.11,  
233 1.62] (Table S3) and for  $\theta_i$  was [1.07, 1.54] (Table S5)). This was confirmed when focusing only  
234 on the positive frequency-dependent copying individuals: The Bayesian 95% CIs were [1.14,  
235 1.80] (Table S4) and [0.71, 1.10] (Table S6), respectively.

236 The manner in which individual variation in social-information use of positive frequency-  
237 dependent copying individuals changes over time is visualised in Figure 4a-c. The social learn-  
238 ing weights generally decreased with experimental round. However, some individuals in the

239 Moderate- and the High-uncertain conditions accelerated rather than decreased their reliance on  
240 social learning over time. Interestingly, those accelerating individuals tended to have a larger  
241 conformity exponent (Figure S18). In addition, the time-dependent  $\theta_{i,t}$  in our alternative model  
242 generally increased with experimental round in the Moderate- and the High-uncertainty condi-  
243 tions (see the appendix; Figure S26), although the fitting of  $\theta_{i,t}$  in the alternative model was  
244 relatively unreliable (Figure S20). These findings suggest that conformists tended to use asocial  
245 learning at the outset but increasingly started to conform as the task proceeded.

246 Extensive variation in the temporal dynamics of the social learning weight  $\sigma_{i,t}$  was also found  
247 for the negative-frequency dependent copying individuals but not found for the random choice  
248 individuals (Figure S14). Individuals deploying a random choice strategy exhibited a  $\sigma_{i,t}$  that ap-  
249 proached to zero, indicating that their decision-making increasingly relied exclusively on asocial  
250 reinforcement learning as the task proceeded.

251 No significant fixed effects were found in other asocial learning parameters such as the learn-  
252 ing rate  $\alpha_i$  and the mean inverse temperature  $\bar{\beta}_i = (\sum_t \beta_{i,t})/70$  (Table S7, Table S8 and Figure  
253 S15).

254 In summary, our experiments on adult humans revealed asymmetric influences of increasing  
255 task uncertainty and increasing group size on the social learning parameters. The conformity  
256 exponent increased with task uncertainty on average but the proportion of positive frequency-  
257 dependent copying individuals showed a corresponding decrease, due to the extensive individual  
258 variation emerging in the High-uncertain condition. Conversely, group size had a positive effect  
259 on the mean social learning weight, but did not affect conformity (Figure 3, 4a-c).

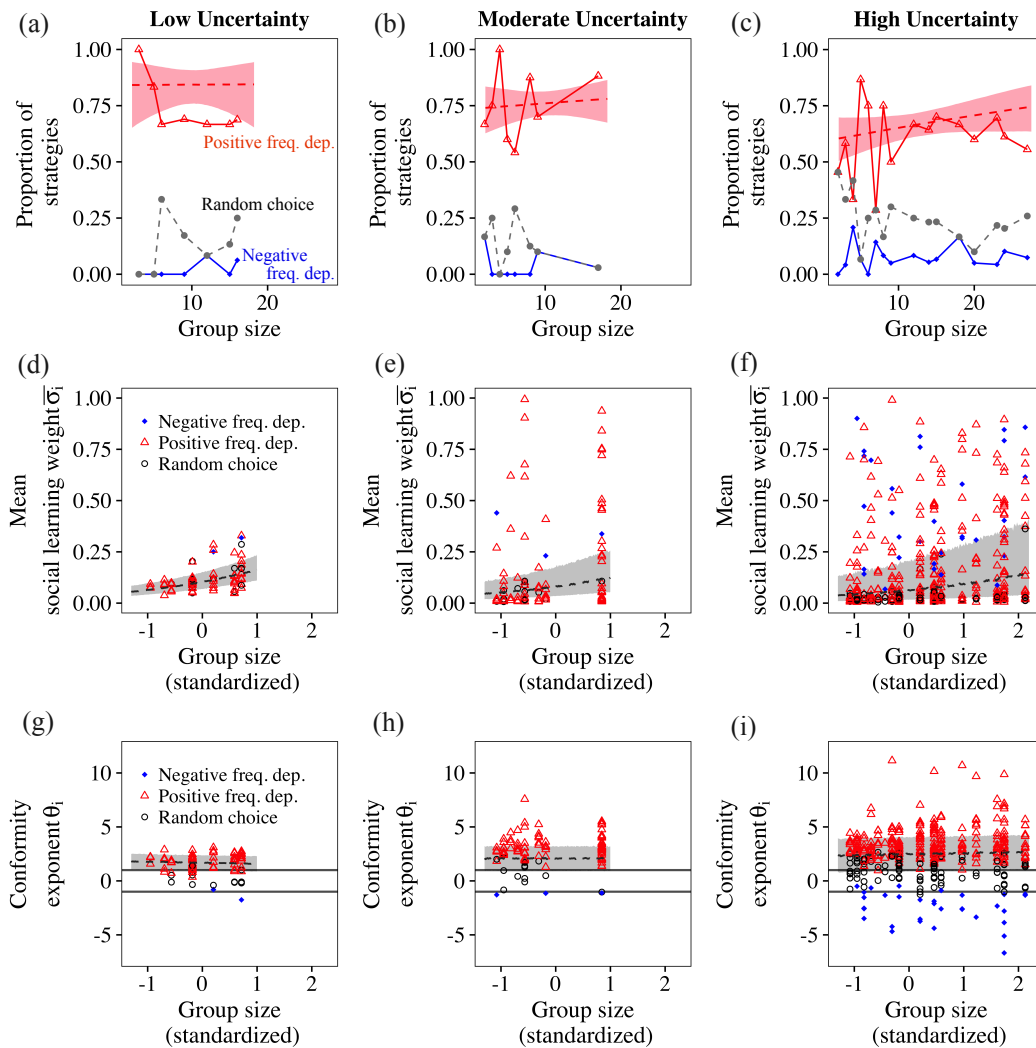

**Figure 3:** Model fitting for the three different task's uncertain conditions (the Low-, Moderate- and High-uncertainty) and the different group size. Three different learning strategies are shown in different styles (red-triangle: positive frequency-dependent learning, blue-circle: negative frequency-dependent learning; grey-circle: nearly random choice strategy). (a-c) Frequencies of three different learning strategies. Note that a sum of the frequencies of these three strategies in the same group size does not necessarily equal to 1, because there are a small number of individuals eliminated from this analysis due to insufficient data. (d-f) Estimated social learning weight, and (g-i) estimated conformity exponent, for each individual shown for each learning strategy. The 50% Bayesian CIs of the fitted GLMMs are shown by dashed lines and shaded areas. The horizontal lines in (g-i) show a region  $-1 < \theta_i < 1$ .

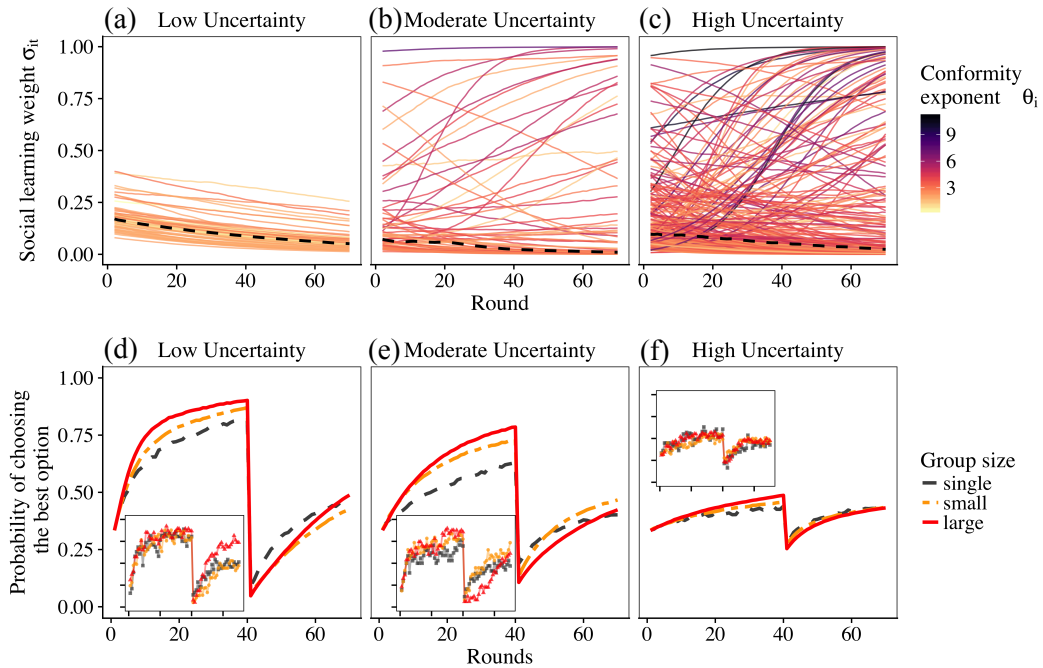

**Figure 4:** (a-c) Change in fitted values (i.e. median of the Bayesian posterior distribution) of the social learning weight  $\sigma_{i,t}$  with time for each individual, for each level of task uncertainty. Thick dashed lines are the median values of  $\sigma_{i,t}$  across the subjects for each uncertainty condition. Individual conformity exponent values  $\theta_i$  are shown in different colours (higher  $\theta_i$  is darker). (d-f) Change in average decision accuracy of the individual-based post-hoc model simulations using the experimentally fit parameter values (main panels). The inner panels show the average decision accuracies of the experimental participants. Each line indicates different group-size categories (red-solid: large groups, orange-halfdashed: small groups, grey-dashed: lone individuals). All individual performances were averaged within the same size category. The large or small groups were categorised using the median sizes for each experimental condition, i.e. small groups were:  $n \leq 9$ ,  $n \leq 6$  and  $n \leq 11$  for the Low-, Moderate- and High-uncertain conditions, respectively.

### 260 **1.3 A balance between the collective decision accuracy and the herding effect**

261 Figure 4d-f show the change over time in performance with different group sizes and different  
262 uncertainty conditions, generated by the post-hoc simulations of the parameter-fitted model. The  
263 mean decision accuracies of the experimental groups are shown in the inner windows. Because  
264 the post-hoc simulations were run for 5,000 replications for each group size, which should gen-  
265 erate more robust pattern than the raw experimental data basing only on a limited number of  
266 experimental replications, and given the correspondence between simulations and data, below  
267 we concentrate our interpretation on the simulated results.

268 Prior to the environmental change (Round 1 to 40), larger groups performed better on average  
269 than did both smaller groups and lone individuals across all the uncertainty levels, suggesting  
270 swarm intelligence was operating. However, after the environmental change (i.e. from Round 41)  
271 performance differed between the conditions. In the Low-uncertain condition, where we found  
272 that the participants were most likely to have a relatively weak positive frequency-dependence  
273 (i.e.  $\bar{\theta} = 1.65$ ), large groups again made more accurate decisions than small groups (Figure 4d,  
274 from Round 41). However, in the Moderate- and the High-uncertain condition, where we found  
275 that participants were most likely to have strong positive frequency dependence ( $\bar{\theta} = 3.00$  and  
276 2.67, c.f. 1.65 in the Low-uncertainty condition), the large groups seemed to get stuck on the  
277 suboptimal option after the change (Figure 4e and 4f, from Round 41), although the decision  
278 accuracy did not substantially differ with group size in the High-uncertain condition.

279 Lone individuals in the Low-uncertain condition recovered performance more quickly than  
280 did both the small and large groups even though the lone individuals performed worse in the first-  
281 half of the task (Figure 4d), suggesting that asocial learners are more capable of detecting the

282 environmental change than individuals in groups. This might be due to the higher exploration rate  
283 of lone individuals (both  $\mu_{p_0^*}$  and  $\mu_e$  of solitary individuals were smaller than those of grouping  
284 individuals; Table 2).

285 Overall, the pattern of results was broadly consistent with our predictions (Figure 1). We  
286 confirmed that in the Low-uncertainty condition, where individuals have weaker positive fre-  
287 quency bias, larger groups were more accurate than smaller groups while retaining flexibility  
288 in their decision-making (i.e. swarm intelligence dominates). However, in the Moderate- and  
289 the High-uncertain conditions, larger groups performed better prior to environmental change but  
290 were vulnerable to getting stuck with an out-dated maladaptive option due to the larger estimated  
291 conformity exponent, thereby generating the conflict between swarm intelligence and maladap-  
292 tive herding.

## 293 **2 Discussion**

294 We investigated whether and how human social learning strategies regulate the conflict between  
295 swarm intelligence and herding behaviour using a collective learning-and-decision-making task  
296 combined with simulation and model fitting. We examined whether manipulating the reliability  
297 of asocial learning and group size would affect the use of social information, and thereby alter the  
298 collective decision dynamics, as suggested by our computational model simulation. Although a  
299 theoretical study has suggested that reliance on social learning and conformity bias would play a  
300 role in collective dynamics (Kandler and Laland, 2013), thus far no empirical studies have quan-  
301 titatively investigated the population-level consequences of these two different social learning  
302 processes. Our high-resolution, model-based behavioural analysis using a hierarchical Bayesian

303 statistics enabled us to identify individual-level patterns and variation of different learning pa-  
304 rameters and to explore their population-level outcomes. The results provide strong support for  
305 our hypothesis that the conflict between the swarm intelligence effect and maladaptive herding  
306 can be predicted with knowledge of human social learning strategies.

307 Consistent with previous empirical findings (e.g., Morgan et al., 2012; Muthukrishna et al.,  
308 2014), adult human participants were increasingly likely to make a conformity-biased choice as  
309 the uncertainty of the task went up (i.e. as it became more difficult to determine the best option.  
310 Figure 3g-i). The fitted global mean values of the conformity exponent parameters were 3.0 and  
311 2.7 in the Moderate- and the High-uncertain conditions, respectively (Table 2), and these values  
312 were sufficiently high to cause larger populations to get stuck on a suboptimal option following  
313 environmental change (Figure 1b; Figure 4e, 4f). Conversely, in the Low-uncertain condition  
314 individuals exhibited relatively weak conformity (i.e.  $\bar{\theta} \approx 1.65$ ), allowing larger groups to escape  
315 the suboptimal option, and retain their swarm intelligence (Figure 1a; Figure 4d). Although  
316 the social learning weight was also found to be contingent upon the environmental factors, the  
317 estimated mean value was  $\bar{\sigma}_i = 0.3$  (Figure 3d-f; Figure S14). This implies a weaker social  
318 than asocial influence on decision-making as reported in several other experimental studies (e.g.  
319 Efferson et al., 2008; McElreath et al., 2005; Mesoudi, 2011; Toyokawa et al., 2017). Thanks to  
320 this relatively weak reliance of social learning, the kind of herding that would have blindly led a  
321 group to any option regardless of its quality (like the ‘symmetry breaking’ known in social insect  
322 collective foraging systems. Figure 2c,d; Camazine et al., 2001; Sumpter, 2010), did not occur.  
323 Research that explores the factors that can induce higher social learning weights in humans,  
324 in order to understand under which circumstances herd behaviour would dominate, would be

325 valuable.

326 Individual differences in exploration might also play a crucial role in shaping collective de-  
327 cision dynamics. Although a majority of participants adopted a positive frequency-dependent  
328 copying strategy, some individuals exhibited negative frequency dependent or random decision-  
329 making strategy (Figure 3a-c). It is worth noting that the random choice strategy was associated  
330 with more exploration than the other strategies, because it led to an almost random choice at a  
331 rate  $\sigma_i$ , irrespective of the options' quality. In addition, negative-frequency dependent copying  
332 individuals could also be highly exploratory. These individuals tended to avoid choosing an op-  
333 tion upon which the other people had converged and would explore the other two 'unpopular'  
334 options. Interestingly, in the High-uncertain condition the mean social learning weights of the  
335 negative-frequency dependent copying individuals ( $\bar{\sigma}_i \approx 0.5$ ) were larger than that of the other  
336 two strategies ( $\bar{\sigma}_i \approx 0.1$ , Figure S14), indicating that these individuals engaged in such majority-  
337 avoiding exploration relatively frequently. Such high exploratory tendencies would prevent in-  
338 dividuals from converging on a better option, leading to a diminishing of swarm intelligence in  
339 high-uncertainty circumstances (Figure 4f).

340 Individual differences have received increasing attention in both collective behaviour and  
341 animal social learning studies (e.g. Jolles et al., 2018; Michelena et al., 2010; Planas-sitja et al.,  
342 2015), and across the human behavioural sciences (e.g. Gray et al., 2017; Mesoudi et al., 2016).  
343 Our finding that the effects of individual variation depend on uncertainty implies that human  
344 subjects' use of social learning strategies is deployed plastically, and is not a fixed propensity (i.e.  
345 personality trait), that differs rigidly between individuals (Dingemanse et al., 2010; Toyokawa  
346 et al., 2017). Our approach of combining with individual-based simulation and experimentation



347 could potentially prove a powerful tool with which to explore decision-making in other animals.

348 Another methodological advantage of using computational models to study social learn-  
349 ing strategies is its explicitness of assumptions about the temporal dynamics of behaviour. It  
350 has been argued that just observing the final frequencies of learned behaviour does not provide  
351 enough information to determine what asocial and/or social learning processes might have been  
352 used because multiple learning-and-decision mechanisms are equally likely to produce the same  
353 population-level patterns (Barrett, 2018; Hoppitt and Laland, 2013). For example, very exploita-  
354 tive asocial reinforcement learners (i.e. exploitation parameter  $\beta_{i,t}$  is large and the social learning  
355 weight  $\sigma_{i,t}$  is nearly zero) and conformity-biased social learners (conformity exponent  $\theta_i$  is large  
356 and  $\sigma_{i,t}$  is positive) would eventually converge on the same option, resulting in the same final  
357 behavioural steady state. However, how they explored the environment, as well as how they re-  
358 acted to the other individuals in the same group, are significantly different and they could produce  
359 qualitatively different collective temporal dynamics. A time-depth perspective is crucially im-  
360 portant in order to model the relationship between individual behavioural mechanisms and group  
361 behavioural dynamics (Biro et al., 2016).

362 The Internet-based experimentation allowed us to conduct a real-time interactive behavioural  
363 task with larger subject pools than a conventional laboratory-based experiment. This enabled us  
364 not only to quantify the individual-level learning-and-decision processes (e.g. Ahn et al., 2014;  
365 Daw et al., 2006) but also to map these individual-level processes on to the larger-scale collec-  
366 tive behaviour (Raafat et al., 2009; Salganik et al., 2006; Sumpter, 2010). Although there are  
367 always questions about the validity of participants' behaviour when deploying the web-based  
368 method, we believe that the computational modelling approach coupled with higher statistical

369 power due to the large sample size, compensates for any drawbacks. The fact that our learning  
370 model could approximate the participants' decision trajectories effectively suggest that most of  
371 the participants engaged seriously with solving the task. An increasing body of evidence sup-  
372 ports the argument that web-based behavioural experiments are as reliable as results from the  
373 laboratory (e.g. Dandurand et al., 2008; Hergueux and Jacquemet, 2015).

374 The diverse effects of social influence on the collective wisdom of a group has been drawing  
375 substantial attention (e.g. Becker et al., 2017; Jayles et al., 2017; Lorenz et al., 2011; Lorge et al.,  
376 1958; Muchnik et al., 2013). The bulk of this literature, including many jury models and elec-  
377 tion models (Hastie and Kameda, 2005; List, 2004), has focused primarily on the static estimation  
378 problem, where the 'truth' is fixed from the outset. However, in reality, there are many situations  
379 under which the state of the true value is changing over time so that monitoring and tracking  
380 the pattern of change is a crucial determinant of decision performance (Payzan-Lenestour and  
381 Bossaerts, 2011). In such temporally dynamic environments, decision-making and learning are  
382 coordinated to affect future behavioural outcomes recursively (Sutton and Barto, 1998). Our  
383 experimental task provides a simple vehicle for exploring collective intelligence in a dynamic  
384 situation, which encompasses this learning-and-decision-making feedback loop. Potentially, in-  
385 tegrating the wisdom of crowds with social learning and collective dynamics research will facil-  
386 itate the more tractable use of swarm intelligence in a temporary changing world.

387 In summary, a powerful combination of experimentation and theoretical modeling sheds new  
388 light on when groups of individuals will exhibit the wisdom of the crowds and when maladapt-  
389 tive herding. Our analysis implies that herding is most likely amongst individuals in large groups  
390 exposed to challenging tasks. That is because challenging tasks lead to greater uncertainty and

391 thereby elicit greater conformist learning amongst individuals, whilst rates of copying increase  
392 with group size. Difficult tasks, by definition, render identification of the optimal behavior more  
393 challenging, allowing groups sometimes to converge on maladaptive outcomes. Conversely, the  
394 reduced conformity levels of individuals in small groups, and the greater probability that social  
395 information would be accurate for less-challenging tasks, generated ‘wisdom of the crowd’ ef-  
396 fects in most other circumstances. Our findings provide clear evidence that the conflict between  
397 swarm intelligence and maladaptive herding can be predicted with knowledge of human social  
398 learning strategies.

### 399 **3 Material and methods**

#### 400 **3.1 Computational learning-and-decision model**

401 We modelled a learning and decision process based on standard reinforcement-learning theory  
402 (Sutton and Barto, 1998). Following previous empirical studies of social learning strategies in  
403 humans (e.g. McElreath et al., 2005, 2008; Toyokawa et al., 2017), our model consists of two  
404 steps. First, an individual  $i$  updates the estimated average reward associated with an option  $m$  at  
405 round  $t$ , namely Q-value ( $Q_{i,t}(m)$ ), according to the Rescorla-Wagner rule (Trimmer et al., 2012)  
406 as follows:

$$Q_{i,t+1}(m) = Q_{i,t}(m) + \alpha_i \mathbb{1}(m, m_{i,t}) (r_{i,t}(m) - Q_{i,t}(m)), \quad (3)$$

407 where  $\alpha_i$  ( $0 \leq \alpha_i \leq 1$ ) is a *learning rate* parameter of individual  $i$  determining the weight given to  
408 new experience and  $r_{i,t}(m)$  is the amount of monetary reward obtained from choosing the option

409  $m$  in round  $t$ .  $\mathbb{1}(m, m_{i,t})$  is the binary action-indicator function of individual  $i$ , given by

$$\mathbb{1}(m, m_{i,t}) = \begin{cases} 1, & \text{if } m_{i,t} = m \text{ or } t = 1, \\ 0, & \text{otherwise.} \end{cases} \quad (4)$$

410 Therefore,  $Q_{i,t}(m)$  is updated only when the option  $m$  was chosen; when the option  $m$  was not  
 411 chosen,  $Q_{i,t}(m)$  is not updated (i.e.  $Q_{i,t+1}(m) = Q_{i,t}(m)$ ). Note that, only in the first round  $t = 1$ ,  
 412 all Q-values are updated by using the chosen option's reward  $r_{i,1}(m)$ , so that the individual can  
 413 set a naive 'intuition' about the magnitude of reward values she/he would expect to earn from a  
 414 choice in the task; namely,  $Q_{i,t=2}(1) = Q_{i,t=2}(2) = Q_{i,t=2}(3) = \alpha_i r_{i,t=1}(m)$ . In practical terms,  
 415 this prevents the model from being overly sensitive to the first experience. Before the first choice,  
 416 individuals had no prior preference for either option (i.e.  $Q_{i,1}(1) = Q_{i,1}(2) = Q_{i,1}(3) = 0$ ).

417 Second, a choice is made for an option  $m$  by individual  $i$  at the choice probability  $P_{i,t}(m)$  that  
 418 is determined by a weighted average of social and asocial influences:

$$P_{i,t}(m) = \sigma_{i,t} S_{i,t}(m) + (1 - \sigma_{i,t}) A_{i,t}(m), \quad (5)$$

419 where  $\sigma_{i,t}$  is the *social learning weight* ( $0 \leq \sigma_{i,t} \leq 1$ ), and  $S_{i,t}(m)$  and  $A_{i,t}(m)$  are social and  
 420 asocial influences on the choice probability, respectively ( $0 \leq S_{i,t}(m) \leq 1$  and  $0 \leq A_{i,t}(m) \leq 1$ ).  
 421 Note that the sum of choice probabilities, the sum of social influences and the sum of asocial  
 422 influences are all equal to 1; namely,  $\sum_{k \in \text{options}} P_{i,t}(k) = 1$ ,  $\sum_k S_{i,t}(k) = 1$  and  $\sum_k A_{i,t}(k) = 1$ .

423 As for the asocial influence  $A_{i,t}$ , we assumed the so-called softmax (or logit choice) function,

424 which is widely used in the reinforcement-learning literature:

$$A_{i,t}(m) = \frac{\exp(\beta_{i,t} Q_{i,t}(m))}{\sum_{k \in \text{options}} \exp(\beta_{i,t} Q_{i,t}(k))}, \quad (6)$$

425 where  $\beta_{i,t}$ , called *inverse temperature*, manipulates individual  $i$ 's sensitivity to the Q-values (in  
426 other words, controlling the proneness to explore). As  $\beta_{i,t}$  goes to zero, asocial influence approx-  
427 imates to a random choice (i.e. highly explorative). Conversely, if  $\beta_{i,t} \rightarrow +\infty$ , the asocial influ-  
428 ence leads to a deterministic choice in favour of the option with the highest Q-value (i.e. highly  
429 exploitative). For intermediate values of  $\beta_{i,t}$ , individual  $i$  exhibits a balance between exploration  
430 and exploitation (Daw et al., 2006; Toyokawa et al., 2017). We allowed for the possibility that  
431 the balance between exploration-exploitation could change as the task proceeds. To depict such  
432 time dependence in exploration, we used the equation:  $\beta_{i,t} = \beta_{i,0}^* + \epsilon_i t / 70$ . If the slope  $\epsilon_i$  is  
433 positive (negative), asocial influence  $A_{i,t}$  becomes more and more exploitative (explorative) as  
434 round  $t$  increases. For a model fitting purpose, the time-dependent term  $\epsilon_i t$  is scaled by the total  
435 round number 70.

436 We modelled the social influence (i.e. the frequency-dependent copying) on the probability  
437 that individual  $i$  chooses option  $m$  at round  $t$  as follows (McElreath et al., 2005, 2008; Aplin et al.,  
438 2017; Barrett et al., 2017):

$$S_{i,t}(m) = \frac{\left(F_{t-1}(m) + 0.1\right)^{\theta_i}}{\sum_{k \in \text{options}} \left(F_{t-1}(k) + 0.1\right)^{\theta_i}}, \quad (7)$$

439 where  $F_{t-1}(m)$  is a number of choices made by other individuals (excluding her/his own choice)  
440 for the option  $m$  in the preceding round  $t - 1$  ( $t \geq 2$ ).  $\theta_i$  is individual  $i$ 's *conformity exponent*,

441  $-\infty \leq \theta_i \leq +\infty$ . When this exponent is larger than zero, higher social influence is given to  
442 an option which was chosen by more individuals (i.e. positive frequency bias). When  $\theta_i < 0$ ,  
443 on the other hand, higher social influence is given to an option that fewer individuals chose in  
444 the preceding round  $t - 1$  (i.e. negative frequency bias). To implement the negative frequency  
445 dependence, we added a small number 0.1 to  $F$  so that an option chosen by no one (i.e.  $F_{t-1} = 0$ )  
446 could provide the highest social influence when  $\theta_i < 0$ . Note, there is no social influence when  
447  $\theta_i = 0$  because in this case the ‘social influence’ favours a uniformly random choice,  $S_{i,t}(m) =$   
448  $1/(1 + 1 + 1) = 1/3$ , independent of the social frequency distribution. Note also that, in the  
449 first round  $t = 1$ , we assumed that the choice is only determined by the a-social softmax function  
450 because there is no social information available.

451 We considered that the social learning weight  $\sigma_{i,t}$  could change over time as assumed in the  
452 inverse temperature  $\beta_{i,t}$ . To let  $\sigma_{i,t}$  satisfy the constraint  $0 \leq \sigma_{i,t} \leq 1$ , we used the following  
453 sigmoidal function:

$$\sigma_{i,t} = \frac{1}{1 + \exp(-(\sigma_{i,0}^* + \delta_i t/70))}. \quad (8)$$

454 If the slope  $\delta_i$  is positive (negative), the social influence increases (decreases) over time. We  
455 set the social learning weight equal to zero when group size is one (i.e. when an individual  
456 participated in the task alone and/or when  $\sum_{k \in \text{options}} F_{t-1}(k) = 0$ ).

457 We modelled both the inverse temperature  $\beta_{i,t}$  and the social learning weight  $\sigma_{i,t}$  as a time  
458 function since otherwise it would be challenging to distinguish different patterns of learning in  
459 this social learning task (Barrett, 2018). The parameter recovery test confirmed that we were  
460 able to differentiate such processes under these assumptions (Figure S8-S12). While we also

461 considered the possibility of the conformity exponent being time-dependent (i.e.  $\theta_{i,t} = \theta_{i,0}^* +$   
462  $\gamma_i t/70$ ), the parameter recovery test suggested that the individual slope parameter  $\gamma_i$  was not  
463 reliably recovered (Figure S20 and S21), and hence we concentrated our analysis on the time-  
464 independent  $\theta_i$  model. We confirmed that instead using the alternative model where both social  
465 learning parameters were time-dependent (i.e.  $\sigma_{i,t}$  and  $\theta_{i,t}$ ) did not qualitatively change our results  
466 (Figure S25 and S26).

467 In summary, the model has six free parameters that were estimated for each individual human  
468 participant; namely,  $\alpha_i$ ,  $\beta_{i,0}^*$ ,  $\epsilon_i$ ,  $\sigma_{i,0}^*$ ,  $\delta_i$ , and  $\theta_i$ . To fit the model, we used a hierarchical Bayesian  
469 method (HBM), estimating the global means ( $\mu_\alpha$ ,  $\mu_{\beta_0^*}$ ,  $\mu_\epsilon$ ,  $\mu_{\sigma_0^*}$ ,  $\mu_\delta$ , and  $\mu_\theta$ ) and the global vari-  
470 ations ( $\nu_\alpha$ ,  $\nu_{\beta_0^*}$ ,  $\nu_\epsilon$ ,  $\nu_{\sigma_0^*}$ ,  $\nu_\delta$ , and  $\nu_\theta$ ) for each of the three experimental conditions (i.e. the Low-,  
471 Moderate- and High-uncertain condition), which govern overall distributions of individual pa-  
472 rameter values. It has become recognised that the HBM can provide more robust and reliable  
473 parameter estimation than conventional maximum likelihood point estimation in complex cogni-  
474 tive models (e.g. Ahn et al., 2014), a conclusion with which our parameter recovery test agreed  
475 (Figure S10-S12).

## 476 3.2 Agent-based model simulation

477 We ran a series of individual-based model simulations assuming that a group of individuals play  
478 our three-armed bandit task (under the Moderate-uncertainty condition) and that individuals be-  
479 have in accordance with the computational learning-and-decision model. We varied the group  
480 size ( $n \in \{3, 10, 30\}$ ), the mean social learning weight ( $\bar{\sigma} \in \{0.01, 0.1, 0.2, 0.3, \dots, 0.9\}$ ) and  
481 the mean conformity exponent ( $\bar{\theta} \in \{0.5, 1, 3, 6\}$ ), running 10,000 replications for each of the

482 possible parameter  $\times$  group size combinations. As for the other parameter values (e.g. the aso-  
483 cial reinforcement learning parameters;  $\alpha$ ,  $\beta_0^*$ ,  $\epsilon$ ), here we used the experimentally fitted global  
484 means (Table 2 and Table S1). Relaxation of this assumption (i.e. using a different set of aso-  
485 cial learning parameters) does not qualitatively change our story (e.g. Figure S4-S7). Note that  
486 each individual's parameter values were randomly drawn from the distributions centred by the  
487 global mean parameter values fixed to each simulation run. Therefore, the actual composition  
488 of individual parameter values were different between individuals even within the same social  
489 group.

### 490 **3.3 Participants in the online experiment**

491 A total of 755 subjects (354 females, 377 males, 2 others and 22 unspecified; mean age (1 *s.d.*) =  
492 34.33 (10.9)) participated in our incentivised economic behavioural experiment (Figure S2). The  
493 experimental sessions were conducted in December 2015 and in January 2016. We excluded  
494 subjects who disconnected to the online task before completing at least the first 30 rounds from  
495 our learning model fitting analysis, resulted in 699 subjects (573 subjects entered the group (i.e.  
496  $n \geq 2$ ) condition and 126 entered the solitary (i.e.  $n = 1$ ) condition). The task was advertised  
497 using Amazon's Mechanical Turk (AMT; <https://www.mturk.com>; see Video S1; Video S2),  
498 so that the participants could enter anonymously through their own internet browser window.  
499 Upon connecting to the experimental game web page, the participants might be required to wait  
500 on other participants at the virtual 'waiting room' for up to 5 minutes or until the requisite number  
501 of participants arrived, whichever was sooner, before the task starts. The participants were payed  
502 25 cents for a show-up fee plus a waiting-bonus at a rate of 12 cents per minute (i.e. *pro rata*



503 to 7.2 USD per hour) and a game bonus ( $mean \pm 1s.d. = 1.7 \pm 0.79$  USD) depending on their  
504 performance in the task. The total time, including net time spent in the waiting room, tended to  
505 be less than 10 minutes.

### 506 **3.4 The online three-armed bandit task**

507 The participants performed a three-armed bandit task for 70 rounds. Each round started with the  
508 choice stage at which three slot machines appeared on the screen (Figure S1; Video 1). Partic-  
509 ipants chose a slot by clicking the mouse pointer (or tapping it if they used a tablet computer).  
510 Participants had a maximum of 8 seconds to make their choices. If no choice was made during  
511 the choice stage, a ‘TIME OUT’ message appeared in the centre of the screen without a monetary  
512 reward (average number of missed rounds per participant was 0.18 out of 70 rounds). Partici-  
513 pants were able to know the rest of the choice time by seeing a ‘count-down bar’ shown at the  
514 top of the experimental screen.

515 Each option yielded monetary rewards randomly drawn from a normal probability distribu-  
516 tion unique to each slot, rounded up to the next integer, or truncated to zero if it would have been a  
517 negative value (Figure S3). The standard deviations of the probabilistic payoff distributions were  
518 identical for all slots and did not change during the task (the  $s.d. = 0.55$ ; although it actually was  
519 slightly smaller than 0.55 due to the zero-truncation). The mean values of the probabilistic pay-  
520 off were different between the options. ‘Poor’, ‘good’ and ‘excellent’ slots generated the lowest,  
521 intermediate and the highest rewards on average, respectively. In the first 40 rounds, there were  
522 two poor and one good options. After the round 40th, one of the poor option abruptly changed to  
523 an excellent option (i.e. environmental change), and from the 41st round there were poor, good

524 and excellent options.

525       Once all the participants in the group made a choice (or had been time-outed), they proceeded  
526 to the feedback stage in which they could see their own payoff from the current choice for two  
527 seconds ('0' was shown if they had been time-outed), while they could not see others' reward  
528 values. After this feedback stage, subjects proceeded to the next round's choice stage. From the  
529 second round, a distribution of choices made by all participants in the group at the preceding  
530 round (i.e. the social frequency information) was shown below each slot.

531       Before the task started, participants had read an illustrated instruction which told them that  
532 they would play 70 rounds of the task, that the payoff would be randomly generated per choice  
533 but associated with a probability distribution unique to each slot machine, i.e. the profitability  
534 of the slot might be different from each other, that the environment might change during the  
535 task so that the mean payoff from the slots might secretly change during the task, and that their  
536 total payout were decided based on the sum of all earnings they achieved in the task. We also  
537 explicitly informed subjects that all participants in the same group played the identical task so  
538 that they could infer that the social information was informative. However, we did not specify  
539 either the true mean payoff values associated with each option, or when and how the mean payoff  
540 would actually change. After reading these instructions, participants proceeded to a 'tutorial task'  
541 without any monetary reward and without the social frequency information, so as to become  
542 familiar with the task.

543       After they completed the behavioural task or were excluded from the task due to a bad internet  
544 connection or due to opening another browser window during the task (see the 'Reducing the risk  
545 of cheating' section in the appendix), subjects proceeded to a brief questionnaire page asking

546 about demographic information, which were skippable. Finally, the result screen was shown,  
547 informing the total monetary reward she/he earned as well as a confirmation code unique for each  
548 participant. Participants could get monetary reward through AMT by inputting the confirmation  
549 code into the form at the AMT's task page.

### 550 **3.5 Manipulating the group size and uncertainty**

551 To manipulate the size of each group, we varied the capacity of the waiting room from 10 to 30.  
552 Because the task was being advertised on the Worker website at AMT for approximately 2 hours,  
553 some participants occasionally arrived after the earlier groups had already started. In that case  
554 the participant entered the newly opened waiting room which was open for the next 5 minutes.  
555 The number of participants arriving declined with time because newly posted alternative tasks  
556 were advertised on the top of the task list, which decreased our task's visibility. This meant that  
557 a later-starting session tended to begin before reaching maximum room capacity, resulting in the  
558 smaller group size. Therefore, the actual size differed between groups.

559 To investigate the effect of the task uncertainty, we manipulated the closeness of each option's  
560 mean payoff value, setting three different conditions in a between-group design. The three condi-  
561 tions were: Low-uncertainty condition (differences between mean payoffs were 1.264;  $N = 113$ ),  
562 Moderate-uncertainty condition (differences between mean payoffs were 0.742;  $N = 132$ ) and  
563 High-uncertainty condition (differences between mean payoffs were 0.3;  $N = 454$ ). The mean  
564 payoff associated with the 'excellent' slot in all three conditions was fixed to 3.1 cents (Figure  
565 S3). These conditions were randomly assigned for each experimental session. However, we re-  
566 cruited more participants in the High-uncertainty condition compared to the other two because

567 we expected that larger group sizes would be needed to generate the collective wisdom in noisier  
568 environments.

### 569 **3.6 Statistical analysis**

570 We used a hierarchical Bayesian method (HBM) to estimate the free parameters of our statis-  
571 tical models, including the computational learning-and-decision-making model. The HBM al-  
572 lows us to estimate individual differences, while ensures these individual variations are bounded  
573 by the group-level global parameters. The HBM was performed under Stan 2.16.2 ([http:](http://mc-stan.org)  
574 [//mc-stan.org](http://mc-stan.org)) in R 3.4.1 (<https://www.r-project.org>) software. The models contained  
575 at least 4 parallel chains and we confirmed convergence of the MCMC using both the Gelman-  
576 Rubin statistics and the effective sample sizes. Full details of the model fitting procedure and  
577 prior assumptions are shown in the appendix.

#### 578 **3.6.1 Parameter recovery test**

579 To check the validity of our model-fitting method, we conducted a ‘parameter recovery test’  
580 so as to examine how well our model fitting procedure had been able to reveal true individual  
581 parameter values. To do this, we generated synthetic data by running a simulation with the  
582 empirically fitted global parameter values, and then re-fitted the model with this synthetic data  
583 using the same procedure. The parameter recovery test showed that the all true global parameter  
584 values were fallen into the 95% Bayesian credible interval (Figure S8), and at least 93% of the  
585 true individual parameter values were correctly recovered (i.e. 96% of  $\alpha_i$ , 93% of  $\beta_{i,0}^*$ , 95% of  
586  $\epsilon_i$ , 97% of  $\sigma_{i,0}^*$ , 96% of  $\delta_i$  and 97% of  $\theta_i$  values were fallen into the 95% Bayesian CI. Figure

587 S9-S12).

### 588 3.6.2 Categorisation of individual learning strategies

589 Based on the 50% CI of the individual *conformity exponent* parameter values  $\theta_i$ , we divided  
590 the participants into the following three different social learning strategies. If her/his 50% CI  
591 of  $\theta_i$  fell above zero ( $\theta_{lower} > 0$ ), below zero ( $\theta_{upper} < 0$ ) or including zero ( $\theta_{lower} \leq 0 \leq$   
592  $\theta_{upper}$ ), she/he was categorised as a ‘positive frequency-dependent copier’, a ‘negative frequency-  
593 dependent copier’, or a ‘random choice individual’, respectively. We used the 50% Bayesian CI  
594 to conduct this categorisation instead of using the more conservative 95% CI because the latter  
595 would cause much higher rates of ‘false negatives’, by which an individual who applied either a  
596 positive frequency-dependent copying or a negative-frequency dependent copying strategy was  
597 falsely labelled as an asocial random choice individual (Figure S10d). Four hundred agents out  
598 of 572 ( $\approx 70\%$ ) were falsely categorised as a random choice learner in the recovery test when we  
599 used the 95% criterion (Figure S10d). On the other hand, the 50% CI criterion seemed to be much  
600 better in terms of the false negative rate which was only 18.5% (i.e. 106 agents), although it might  
601 be slightly worse in terms of ‘false positives’: Thirty-seven agents (6.5%) were falsely labelled  
602 as either a positive frequency-dependent copier or a negative-frequency dependent copier by the  
603 50% CI, whereas the false positive rate of the 95% CI was only 0.2% (Figure S10e). To balance  
604 the risk of false positives and false negatives, we decided to use the 50% CI which seemed to  
605 have more strategy detecting power.

### 606 **3.6.3 Generalised linear mixed models**

607 To examine whether increasing group size and increasing task uncertainty affected individual  
608 use of the positive frequency-dependent copying strategy, we used a hierarchical Bayesian logis-  
609 tic regression model with a random effect of groups. The dependent variable was whether the  
610 participant used the positive frequency-dependent copying (1) or not (0). The model includes  
611 fixed effects of group size (standardised), task uncertainty (0: Low, 0.5: Moderate, 1: High), age  
612 (standardised), gender (0: male, 1: female, NA: others or unspecified), and possible two-way  
613 interactions between these fixed effects.

614 We also investigated the effects of both group size and the task's uncertainty on the fitted  
615 values of the learning parameters. We used a hierarchical Bayesian gaussian regression model  
616 predicting the individual fitted parameter values. The model includes effects of group size (stan-  
617 dardised), task uncertainty (0: Low, 0.5: Moderate, 1: High), age (standardised), gender (0:  
618 male, 1: female, NA: others or unspecified), and two-way interactions between these fixed ef-  
619 fects. We assumed that the variance of the individual parameter values might be contingent upon  
620 task uncertainty because we had found in the computational model-fitting result that the fitted  
621 global variance parameters (i.e.  $v_{\sigma_0^*}$ ,  $v_{\delta}$  and  $v_{\theta}$ ) were larger in more uncertain conditions (Table  
622 S1).

### 623 **3.6.4 Post-hoc model simulation for Figure 4d-f**

624 So as to evaluate how accurately our model can generate observed decision pattern in our task  
625 setting, we ran a series of individual-based model simulation using the fitted individual param-  
626 eter values (i.e. means of the individual posterior distributions) for each group size for each

627 uncertainty condition. At the first step of the simulation, we assigned a set of fitted parameters  
628 of a randomly-chosen experimental subject from the same group size and the same uncertain  
629 condition to an simulated agent, until the number of agents reaches the simulated group size. We  
630 allowed duplicate choice of experimental subject in this parameter assignment. At the second  
631 step, we let this synthetic group of agents play the bandit task. We repeated these steps 5,000  
632 times for each group size, task uncertainty.

### 633 **3.7 Code and data availability**

634 The browser based online task was built by Node.js (<https://nodejs.org/en/>) and socket.io  
635 (<https://socket.io>), and the code are available on a GitHub repository ([https://github.](https://github.com/WataruToyokawa/MultiPlayerThreeArmedBanditGame)  
636 [com/WataruToyokawa/MultiPlayerThreeArmedBanditGame](https://github.com/WataruToyokawa/MultiPlayerThreeArmedBanditGame)). Analyses were conducted in  
637 R (<https://www.r-project.org>) and simulations of individual based models were conducted  
638 in Mathematica (<https://www.wolfram.com>), both of which including data are available on an  
639 online repository (<https://github.com/WataruToyokawa/ToyokawaWhalenLaland2018>).

## 640 **4 Ethics statement**

641 This study was approved by University of St Andrews (BL10808).

## 642 **5 Competing interest**

643 We have no competing interest.

## 644 **6 Authors' contributions**

645 WT, AW and KNL planned the study and built the computational model. WT ran simulations.

646 WT and AW made the experimental material, ran the web-base experiment, and collected the

647 experimental data. WT, AW and KNL analysed the data and wrote the manuscript.

## 648 **7 Acknowledgements**

## 649 **8 Funding**

650 This research was supported by The John Templeton Foundation (KNL; 40128) and Suntory

651 Foundation Research Support (WT; 2015-311). WT was supported by JSPS Overseas Research

652 Fellowships (H27-11).



## 653 **References**

654 Ahn, W. Y., Vasilev, G., Lee, S. H., Busemeyer, J. R., Kruschke, J. K., Bechara, A., and Vassileva,  
655 J. (2014). Decision-making in stimulant and opiate addicts in protracted abstinence: Evidence  
656 from computational modeling with pure users. *Frontiers in Psychology*, 5(AUG):1–15. (doi:  
657 10.3389/fpsyg.2014.00849.

658 Aplin, L. M., Sheldon, B. C., and McElreath, R. (2017). Conformity does not perpetuate sub-  
659 optimal traditions in a wild population of songbirds. *Proceedings of the National Academy of*  
660 *Sciences*, page 201621067. (doi: 10.1073/PNAS.1621067114.

661 Arbilly, M., Motro, U., Feldman, M. W., and Lotem, A. (2011). Evolution of social learning when  
662 high expected payoffs are associated with high risk of failure. *Journal of the Royal Society,*  
663 *Interface / the Royal Society*, 8(64):1604–15. (doi: 10.1098/rsif.2011.0138.

664 Barrett, B. J. (2018). Equifinality in empirical studies of cultural transmission. *Behavioural*  
665 *Processes*. (doi: 10.1016/j.beproc.2018.01.011.

666 Barrett, B. J., Mcelreath, R. L., Perry, S. E., and Barrett, B. J. (2017). Pay-off-biased social  
667 learning underlies the diffusion of novel extractive foraging traditions in a wild primate. *Pro-*  
668 *ceedings of Royal Society B*, 284.

669 Becker, J., Brackbill, D., and Centola, D. (2017). Network dynamics of social influence in the  
670 wisdom of crowds. *Proceedings of the National Academy of Sciences*, page 201615978. (doi:  
671 10.1073/pnas.1615978114.

672 Berdahl, A., Torney, C., Ioannou, C., Faria, J., and Couzin, I. (2013). Emergent Sensing of

673 Complex Environments by Mobile Animal Groups. *Science*, 339:574–576. (doi: 10.1126/sci-  
674 ence.1229262.

675 Bikhchandani, S., Hirshleifer, D., and Welch, I. (1992). A Theory of Fads, Fashion, Custom, and  
676 Cultural Change as Informational Cascades. *Journal of Political Economy*, 100(5):992. (doi:  
677 10.1086/261849.

678 Biro, D., Sasaki, T., and Portugal, S. J. (2016). Bringing a Time-Depth Perspective to  
679 Collective Animal Behaviour. *Trends in Ecology and Evolution*, 31(7):550–562. (doi:  
680 10.1016/j.tree.2016.03.018.

681 Bonabeau, E., Dorigo, M., and Theraulaz, G. (1999). *Swarm Intelligence: From Natural to*  
682 *Artificial Systems*. Oxford University Press, New York, NY.

683 Bond, R. (2005). Group Size and Conformity. *Group Processes & Intergroup Relations*,  
684 8(4):331–354. (doi: 10.1177/1368430205056464.

685 Boyd, R. and Richerson, P. J. (1985). *Culture and the Evolutionary Process*. University of  
686 Chicago Press, Chicago, IL.

687 Boyd, R. and Richerson, P. J. (1989). Social learning as an adaptation. *Lectures on Mathematics*  
688 *in the Life Sciences*, 20:1–26.

689 Camazine, S., Deneubourg, J.-L., Franks, N. R., Sneyd, J., Theraulaz, G., and Bonabeau, E.  
690 (2001). *Self-Organization in Biological Systems*. Princeton University Press, Princeton, NJ.

691 Chari, V. V. and Kehoe, P. J. (2004). Financial crises as herds: Overturning the critiques. *Journal*  
692 *of Economic Theory*, 119(1 SPEC. ISS.):128–150. (doi: 10.1016/S0022-0531(03)00225-4.

- 693 Cronin, A. L. (2016). Group size advantages to decision making are environmentally  
694 contingent in house-hunting Myrmecina ants. *Animal Behaviour*, 118:171–179. (doi:  
695 10.1016/j.anbehav.2016.06.010.
- 696 Dandurand, F., ShultzEmail, T. R., and Onishi, K. H. (2008). Comparing online and lab meth-  
697 ods in a problem-solving experiment. *Behavior Research Methods*, 40(2):428–434. (doi:  
698 10.3758/BRM.40.2.428.
- 699 Daw, N. D., O’Doherty, J. P., Dayan, P., Seymour, B., and Dolan, R. J. (2006). Cortical substrates  
700 for exploratory decisions in humans. *Nature*, 441(7095):876–9. (doi: 10.1038/nature04766.
- 701 Dingemanse, N. J., Kazem, A. J., Réale, D., and Wright, J. (2010). Behavioural reaction norms:  
702 animal personality meets individual plasticity. *Trends in Ecology and Evolution*, 25(2):81–89.  
703 (doi: 10.1016/j.tree.2009.07.013.
- 704 Efferson, C., Lalive, R., Richerson, P. J., McElreath, R., and Lubell, M. (2008). Conformists and  
705 mavericks: the empirics of frequency-dependent cultural transmission. *Evolution and Human  
706 Behavior*, 29:56–64. (doi: 10.1016/j.evolhumbehav.2007.08.003.
- 707 Feldman, M. W., Aoki, K., and Kumm, J. (1996). Individual Versus Social Learning: Evolution-  
708 ary Analysis in a Fluctuating Environment. *Anthropological Science*, 104(3):209–231. (doi:  
709 10.1537/ase.104.209.
- 710 Franks, N. R., Mallon, E. B., Bray, H. E., Hamilton, M. J., and Mischler, T. C. (2003). Strategies  
711 for choosing between alternatives with different attributes: exemplified by house-hunting ants.  
712 *Animal Behaviour*, 65(1):215–223. (doi: 10.1006/anbe.2002.2032.

- 713 Giraldeau, L.-A., Valone, T. J., and Templeton, J. J. (2002). Potential disadvantages of using  
714 socially acquired information. *Philosophical transactions of the Royal Society of London.  
715 Series B, Biological sciences*, 357(1427):1559–66. (doi: 10.1098/rstb.2002.1065.
- 716 Gray, J., Hilton, J., and Bijak, J. (2017). Choosing the choice: Reflections on modelling deci-  
717 sions and behaviour in demographic agent-based models. *Population Studies*, 71:85–97. (doi:  
718 10.1080/00324728.2017.1350280.
- 719 Hastie, R. and Kameda, T. (2005). The robust beauty of majority rules in group decisions.  
720 *Psychological review*, 112(2):494–508. (doi: 10.1037/0033-295X.112.2.494.
- 721 Hergueux, J. and Jacquemet, N. (2015). Social preferences in the online laboratory: a randomized  
722 experiment. *Experimental Economics*, 18(2):251–283. (doi: 10.1007/s10683-014-9400-5.
- 723 Hoppitt, W. and Laland, K. N. (2013). *Social Learning: An Introduction to Mechanisms, Meth-  
724 ods, and Models*. Princeton University Press.
- 725 Janis, I. L. (1972). *Victims of groupthink: A psychological study of foreign policy*. Houghton  
726 Mifflin Company, Boston, NY.
- 727 Jayles, B., Kim, H.-r., Escobedo, R., Cezera, S., Blanchet, A., Kameda, T., Sire, C., and  
728 Theraulaz, G. (2017). How social information can improve estimation accuracy in hu-  
729 man groups. *Proceedings of the National Academy of Sciences*, 114(47):201703695. (doi:  
730 10.1073/pnas.1703695114.
- 731 Jolles, J. W., Laskowski, K. L., Boogert, N. J., and Manica, A. (2018). Repeatable group differ-

732 ences in the collective behaviour of stickleback shoals across ecological contexts. *Proceedings*  
733 *of Royal Society B*, pages 13–16.

734 Kameda, T. and Hastie, R. (2015). Herd Behavior. In *Emerging Trends in the Social and Behav-*  
735 *ioral Sciences: An Interdisciplinary, Searchable, and Linkable Resource*, pages 1–14. Wiley  
736 Online Library.

737 Kameda, T. and Nakanishi, D. (2002). Cost–benefit analysis of social/cultural learning in a  
738 nonstationary uncertain environment. *Evolution and Human Behavior*, 23(5):373–393. (doi:  
739 10.1016/S1090-5138(02)00101-0.

740 Kandler, A. and Laland, K. N. (2013). Tradeoffs between the strength of conformity and number  
741 of conformists in variable environments. *Journal of theoretical biology*, 332:191–202. (doi:  
742 10.1016/j.jtbi.2013.04.023.

743 Kendal, R. L., Coolen, I., and Laland, K. N. (2004). The role of conformity in foraging when per-  
744 sonal and social information conflict. *Behavioral Ecology*, 15(2):269–277. (doi: 10.1093/be-  
745 heco/arh008.

746 King, A. J. and Cowlshaw, G. (2007). When to use social information: the advantage  
747 of large group size in individual decision making. *Biology letters*, 3(2):137–139. (doi:  
748 10.1098/rsbl.2007.0017.

749 King, A. J. and Sueur, C. (2011). Where Next? Group Coordination and Collective Deci-  
750 sion Making by Primates. *International Journal of Primatology*, 32(6):1245–1267. (doi:  
751 10.1007/s10764-011-9526-7.

- 752 Kline, M. A. and Boyd, R. (2010). Population size predicts technological complexity in Ocea-  
753 nia. *Proceedings of the Royal Society B: Biological Sciences*, 277(1693):2559–2564. (doi:  
754 10.1098/rspb.2010.0452.
- 755 Krause, J. and Ruxton, G. D. (2002). *Living in groups*. Oxford University Press, Oxford, New  
756 York.
- 757 Krause, J., Ruxton, G. D., and Krause, S. (2010). Swarm intelligence in animals and humans.  
758 *Trends in ecology & evolution*, 25(1):28–34. (doi: 10.1016/j.tree.2009.06.016.
- 759 Krause, S., James, R., Faria, J. J., Ruxton, G. D., and Krause, J. (2011). Swarm intelli-  
760 gence in humans: diversity can trump ability. *Animal Behaviour*, 81(5):941–948. (doi:  
761 10.1016/j.anbehav.2010.12.018.
- 762 Laan, A., Madirolas, G., and Polavieja, G. G. D. (2017). Rescuing collective wisdom when  
763 the average group opinion is wrong. *Frontiers in Robotics and AI*, 4(November):1–28. (doi:  
764 10.3389/frobt.2017.00056.
- 765 Laland, K. N. (2004). Social learning strategies. *Animal Learning & Behavior*, 32(1):4–14. (doi:  
766 10.3758/BF03196002.
- 767 Le Bon, G. (1896). *The crowd: study of the popular mind*. Unwin, London, UK, 4th edition.
- 768 Liker, A. and Bokony, V. (2009). Larger groups are more successful in innovative problem  
769 solving in house sparrows. *Proceedings of the National Academy of Sciences*, 106(19):7893–  
770 7898. (doi: 10.1073/pnas.0900042106.

771 List, C. (2004). Democracy in animal groups: a political science perspective. *Trends in Ecology*  
772 *and Evolution*, 19(4):166–168. (doi: 10.1016/j.tree.2004.02.001).

773 List, C., Elsholtz, C., and Seeley, T. D. (2009). Independence and interdependence in collective  
774 decision making: an agent-based model of nest-site choice by honeybee swarms. *Philosophi-*  
775 *cal transactions of the Royal Society of London. Series B, Biological sciences*, 364(1518):755–  
776 762. (doi: 10.1098/rstb.2008.0277).

777 Lorenz, J., Rauhut, H., Schweitzer, F., and Helbing, D. (2011). How social influence can un-  
778 dermine the wisdom of crowd effect. *Proceedings of the National Academy of Sciences of the*  
779 *United States of America*, 108(22):9020–5. (doi: 10.1073/pnas.1008636108).

780 Lorge, I., Fox, D., Davitz, J., and Brenner, M. (1958). A survey of studies contrasting the qual-  
781 ity of group performance and individual performance, 1920-1957. *Psychological Bulletin*,  
782 55(6):337–372. (doi: 10.1037/h0042344).

783 Mackay, C. (1841). *Extraordinary Popular Delusions and the Madness of Crowds*. Richard  
784 Bentley, London, UK.

785 McElreath, R., Bell, A. V., Efferson, C., Lubell, M., Richerson, P. J., and Waring, T. (2008).  
786 Beyond existence and aiming outside the laboratory: estimating frequency-dependent and  
787 pay-off-biased social learning strategies. *Philosophical transactions of the Royal Society of*  
788 *London. Series B, Biological sciences*, 363(1509):3515–28. (doi: 10.1098/rstb.2008.0131).

789 McElreath, R., Lubell, M., Richerson, P. J., Waring, T. M., Baum, W., Edsten, E., Ef-  
790 ferson, C., and Paciotti, B. (2005). Applying evolutionary models to the labora-

791 tory study of social learning. *Evolution and Human Behavior*, 26(6):483–508. (doi:  
792 10.1016/j.evolhumbehav.2005.04.003.

793 Mesoudi, A. (2011). An experimental comparison of human social learning strategies: payoff-  
794 biased social learning is adaptive but underused. *Evolution and Human Behavior*, 32(5):334–  
795 342. (doi: 10.1016/j.evolhumbehav.2010.12.001.

796 Mesoudi, A., Chang, L., Dall, S. R., and Thornton, A. (2016). The Evolution of Individual  
797 and Cultural Variation in Social Learning. *Trends in Ecology & Evolution*, xx:1–11. (doi:  
798 10.1016/j.tree.2015.12.012.

799 Michelena, P., Jeanson, R., Deneubourg, J.-L., and Sibbald, A. M. (2010). Personality and col-  
800 lective decision-making in foraging herbivores. *Proceedings. Biological sciences / The Royal*  
801 *Society*, 277(1684):1093–9. (doi: 10.1098/rspb.2009.1926.

802 Morand-Ferron, J. and Quinn, J. L. (2011). Larger groups of passerines are more efficient prob-  
803 lem solvers in the wild. *Proceedings of the National Academy of Sciences*, 108(38):15898–  
804 15903. (doi: 10.1073/pnas.1111560108.

805 Morgan, T. J. H., Rendell, L. E., Ehn, M., Hoppitt, W., and Laland, K. N. (2012). The evolu-  
806 tionary basis of human social learning. *Proceedings. Biological sciences / The Royal Society*,  
807 279(1729):653–62. (doi: 10.1098/rspb.2011.1172.

808 Muchnik, L., Aral, S., and Taylor, S. J. (2013). Social influence bias: a randomized experiment.  
809 *Science (New York, N.Y.)*, 341(6146):647–51. (doi: 10.1126/science.1240466.



- 810 Muthukrishna, M., Shulman, B. W., Vasilescu, V., and Henrich, J. (2014). Sociality influences  
811 cultural complexity. *Proceedings of Royal Society B*, 281(November 2013):20132511.
- 812 Nicolis, S. and Deneubourg, J. (1999). Emerging patterns and food recruitment in ants: an  
813 analytical study. *Journal of theoretical biology*, 198(4):575–92. (doi: 10.1006/jtbi.1999.0934.
- 814 Payzan-Lenestour, E. and Bossaerts, P. (2011). Risk, unexpected uncertainty, and estimation  
815 uncertainty: Bayesian learning in unstable settings. *PLoS Computational Biology*, 7(1). (doi:  
816 10.1371/journal.pcbi.1001048.
- 817 Planas-sitja, I., Deneubourg, J.-l., Gibon, C., and Sempo, G. (2015). Group personality during  
818 collective decision-making : a multi-level approach. *Proceedings of the Royal Society B:  
819 Biological Sciences*, 282:20142515.
- 820 Pratt, S. C. and Sumpter, D. J. T. (2006). A tunable algorithm for collective decision-making. *Pro-  
821 ceedings of the National Academy of Sciences of the United States of America*, 103(43):15906–  
822 10. (doi: 10.1073/pnas.0604801103.
- 823 Raafat, R. M., Chater, N., and Frith, C. (2009). Herding in humans. *Trends in cognitive sciences*,  
824 13(10):420–8. (doi: 10.1016/j.tics.2009.08.002.
- 825 Reid, C. R. and Latty, T. (2016). Collective behaviour and swarm intelligence in slime moulds.  
826 *FEMS Microbiology Reviews*, 40(6):798–806. (doi: 10.1093/femsre/fuw033.
- 827 Richerson, P. J. and Boyd, R. (2005). *Not By Genes Alone*. University of Chicago Press, Chicago,  
828 IL.

- 829 Rosenberg, L. and Pescetelli, N. (2017). Amplifying Prediction Accuracy using Swarm A . I .  
830 *Intelligent Systems Conference 2017*, (September):1–5.
- 831 Salganik, M. J., Dodds, P. S., and Watts, D. J. (2006). Experimental Study of Inequality and  
832 Cultural Market. *Science*, 311(February).
- 833 Sasaki, T. and Biro, D. (2017). Cumulative culture can emerge from collective intelligence in  
834 animal groups. *Nature Communications*, 8:1–6. (doi: 10.1038/ncomms15049).
- 835 Sasaki, T., Granovskiy, B., Mann, R. P., Sumpter, D. J. T., and Pratt, S. C. (2013). Ant  
836 colonies outperform individuals when a sensory discrimination task is difficult but not when  
837 it is easy. *Proceedings of the National Academy of Sciences*, 110(34):13769–13773. (doi:  
838 10.1073/pnas.1304917110).
- 839 Sasaki, T. and Pratt, S. C. (2012). Groups have a larger cognitive capacity than individuals.  
840 *Current biology : CB*, 22(19):R827–9. (doi: 10.1016/j.cub.2012.07.058).
- 841 Seeley, T., Camazine, S., and Sneyd, J. (1991). Collective decision-making in honey bees: how  
842 colonies choose among nectar sources. *Behavioral Ecology and Sociobiology*, 28:277–290.
- 843 Seeley, T. D. and Visscher, P. K. (2004). Quorum sensing during nest-site selection by honeybee  
844 swarms. *Behavioral Ecology and Sociobiology*, 56(6):594–601. (doi: 10.1007/s00265-004-  
845 0814-5).
- 846 Shaffer, Z., Sasaki, T., and Pratt, S. C. (2013). Linear recruitment leads to allocation  
847 and flexibility in collective foraging by ants. *Animal Behaviour*, 86(5):967–75. (doi:  
848 10.1016/j.anbehav.2013.08.014).

- 849 Street, S. E., Navarrete, A. F., Reader, S. M., and Laland, K. N. (2017). Coevolution of cultural  
850 intelligence , extended life history , sociality , and brain size in primates. *Proceedings of the*  
851 *National Academy of Sciences*, 114(30):1–7. (doi: 10.1073/pnas.1620734114.
- 852 Sumpter, D. J. T. (2010). *Collective Animal Behavior*. Princeton University Press, Princeton,  
853 NJ.
- 854 Sumpter, D. J. T., Krause, J., James, R., Couzin, I. D., and Ward, A. J. W. (2008). Consensus deci-  
855 sion making by fish. *Current biology : CB*, 18(22):1773–7. (doi: 10.1016/j.cub.2008.09.064.
- 856 Sutton, R. S. and Barto, a. G. (1998). *Reinforcement learning: an introduction*. MIT Press,  
857 Cambridge, MA. (doi: 10.1109/TNN.1998.712192.
- 858 Toyokawa, W., Kim, H.-R., and Kameda, T. (2014). Human Collective Intelligence under  
859 Dual Exploration-Exploitation Dilemmas. *PloS one*, 9(4):e95789. (doi: 10.1371/jour-  
860 nal.pone.0095789.
- 861 Toyokawa, W., Saito, Y., and Kameda, T. (2017). Individual differences in learning behaviours in  
862 humans: asocial exploration tendency does not predict reliance on social learning. *Evolution*  
863 *and Human Behavior*, 38(3):325–333. (doi: 10.1016/j.evolhumbehav.2016.11.001.
- 864 Trimmer, P. C., McNamara, J. M., Houston, A. I., and a.R. Marshall, J. (2012). Does natural  
865 selection favour the Rescorla–Wagner rule? *Journal of Theoretical Biology*, 302:39–52. (doi:  
866 10.1016/j.jtbi.2012.02.014.
- 867 Ward, A. J. W., Herbert-Read, J. E., Sumpter, D. J. T., and Krause, J. (2011). Fast and accurate

868 decisions through collective vigilance in fish shoals. *Proceedings of the National Academy of*  
869 *Sciences*, 108(6):2312–2315. (doi: 10.1073/pnas.1007102108).

870 Webster, M. and Laland, K. (2008). Social learning strategies and predation risk: minnows copy  
871 only when using private information would be costly. *Proceedings of the Royal Society B:*  
872 *Biological Sciences*, 275(1653):2869–2876. (doi: 10.1098/rspb.2008.0817).

873 Webster, M. M. and Laland, K. N. (2011). Reproductive state affects reliance on public informa-  
874 tion in sticklebacks. *Proceedings. Biological sciences / The Royal Society*, 278(1705):619–  
875 627. (doi: 10.1098/rspb.2010.1562).

876 Webster, M. M., Whalen, A., and Laland, K. N. (2017). Fish pool their experience to solve  
877 problems collectively. *Nature Ecology and Evolution*, 1(5):1–5. (doi: 10.1038/s41559-017-  
878 0135).

879 Wolf, M., Kurvers, R. H. J. M., Ward, A. J. W., Krause, S., and Krause, J. (2013). Accurate  
880 decisions in an uncertain world: collective cognition increases true positives while decreasing  
881 false positives. *Proceedings. Biological sciences / The Royal Society*, 280(1756):20122777.  
882 (doi: 10.1098/rspb.2012.2777).
